# Supplementary material
Source: Elsevier journal article supplement (https://rcastoragev2.blob.core.windows.net/29ac223220cb2696bca895d31d1ae307/mmc1.pdf)
Supplement: mmc1 [file mmc1.pdf]

**Supplemental information**

**Proline synthesis through PYCR1 is required  
to support cancer cell proliferation and survival  
in oxygen-limiting conditions**

Rebecca L. Westbrook, Esther Bridges, Jennie Roberts, Cristina Escribano-Gonzalez, Katherine L. Eales, Lisa A. Vettore, Paul D. Walker, Elias Vera-Siguenza, Himani Rana, Federica Cuzzo, Kattri-Liis Eskla, Hans Vellama, Abeer Shaaban, Colin Nixon, Hendrik Luuk, Gareth G. Lavery, David J. Hodson, Adrian L. Harris, and Daniel A. Tennant

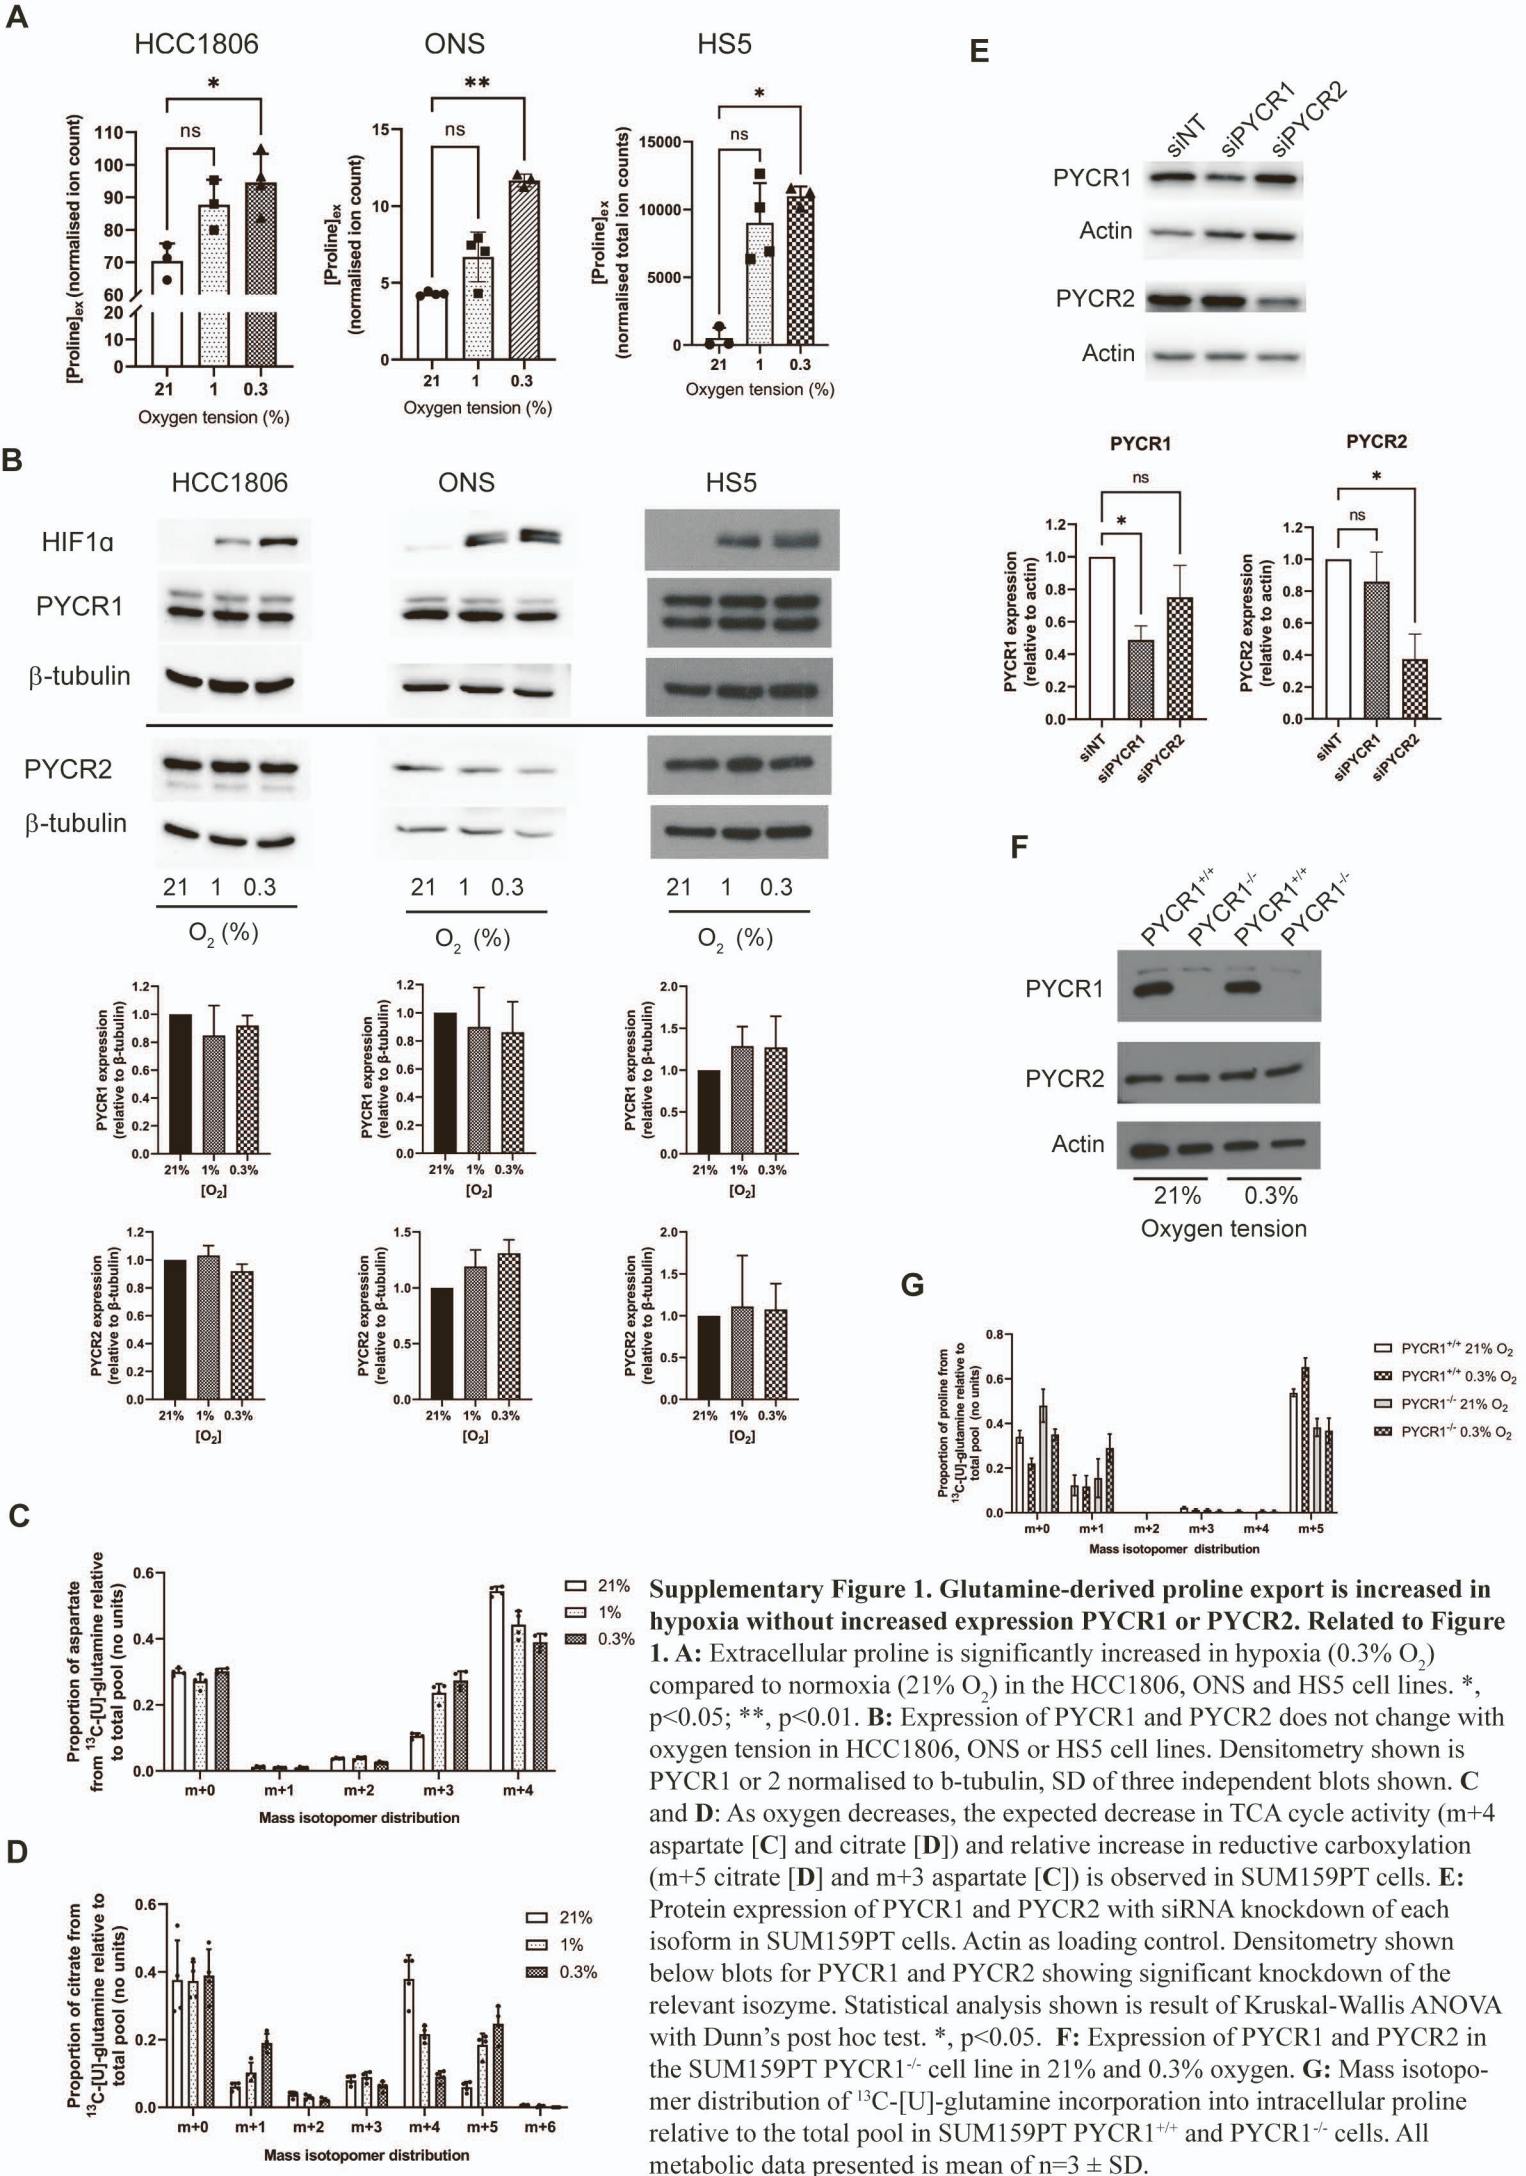

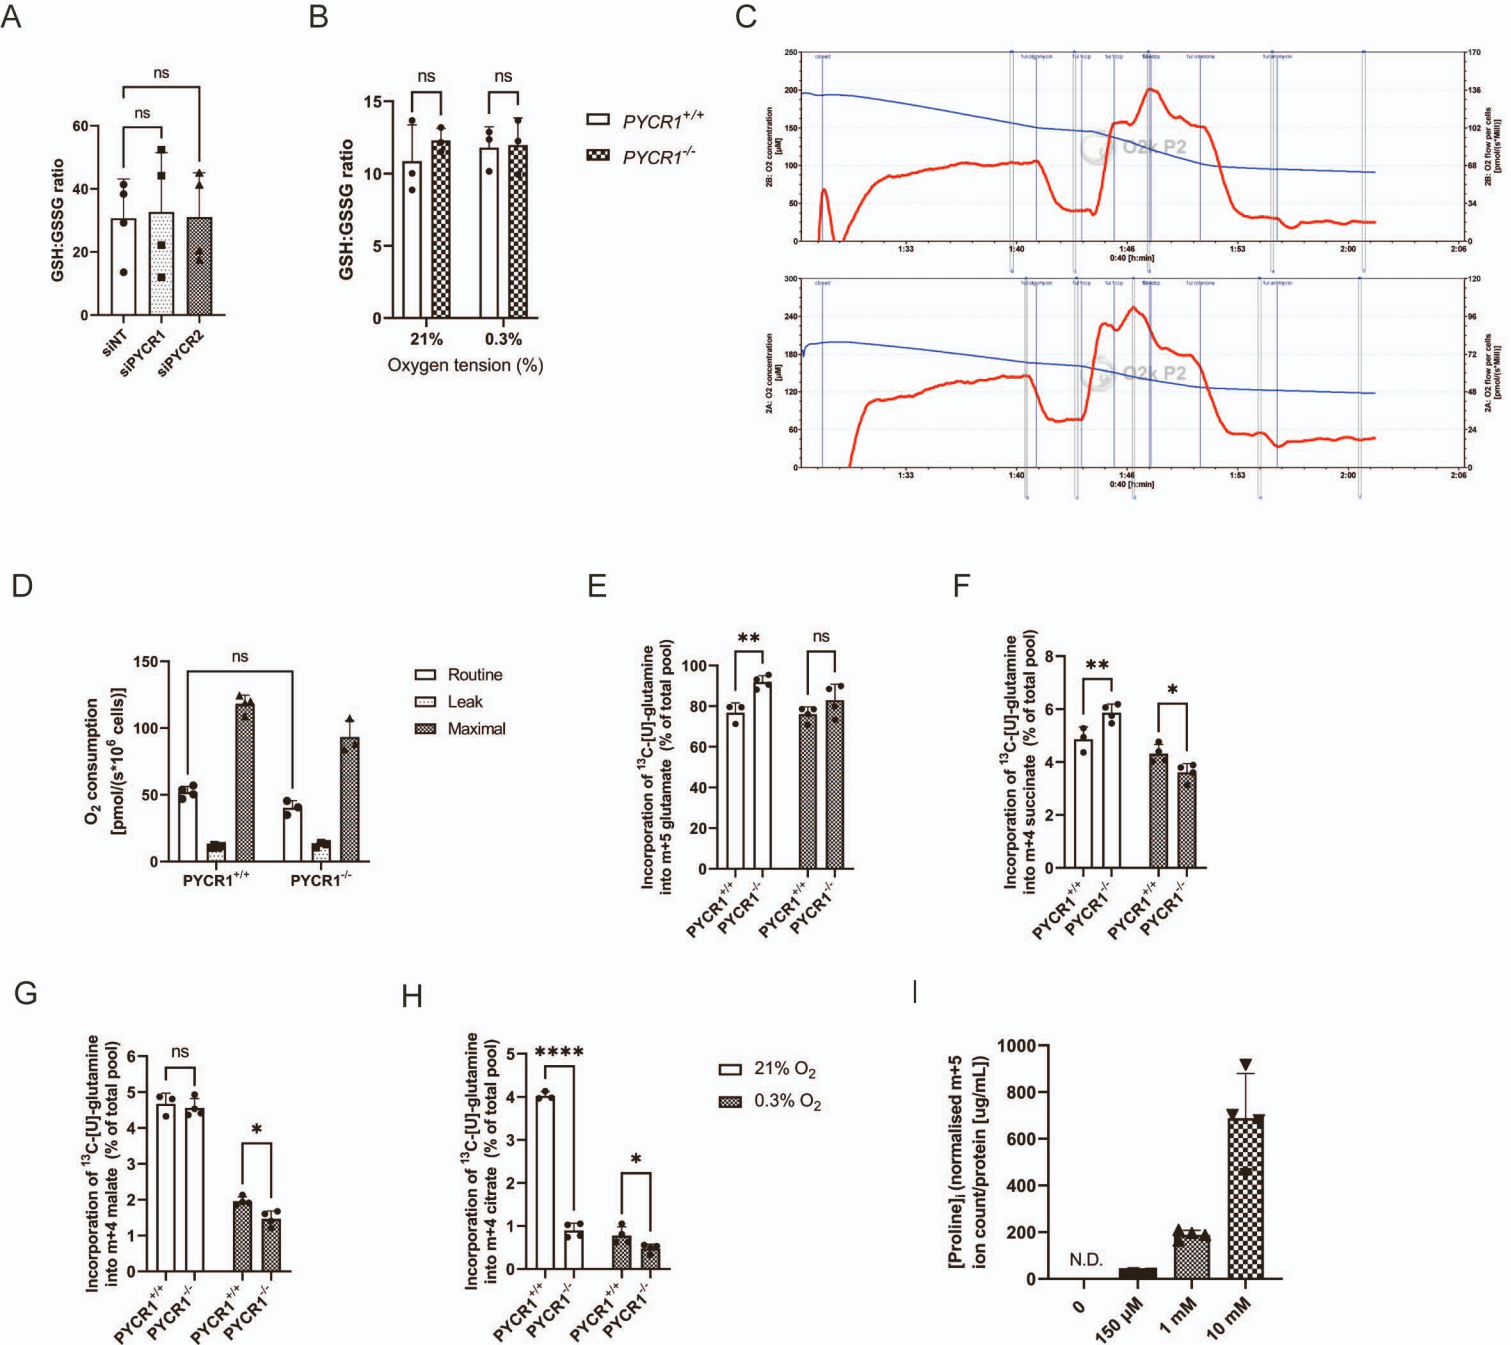

**Supplementary Figure 2. Loss of PYCR1 in 2D cell culture.** **A:** siPYCR1 or 2 does not change GSH:GSSG ratio in the SUM159PT cell line. Related to Figure 2. **B:**  $PYCR1^{-/-}$  cells do not exhibit an alteration in the GSH:GSSG ratio in normoxia or hypoxia. **C:** Representative oxygraph traces of  $PYCR1^{+/+}$  (top) and  $PYCR1^{-/-}$  (bottom) cells. **D:** There is no significant difference in oxygen consumption in  $PYCR1^{-/-}$  cells compared to  $PYCR1^{+/+}$ . Steady-state levels of glutamate (**E**), succinate (**F**), malate (**G**) and citrate (**H**). \*,  $p < 0.05$ ; \*\*,  $p < 0.01$ ; \*\*\*\*,  $p < 0.0001$ . **I:** Abundance of intracellular  $^{13}\text{C}$ -[U]-proline in SUM159PT cells incubated with increasing concentrations. All data presented as mean  $\pm$  SD



A

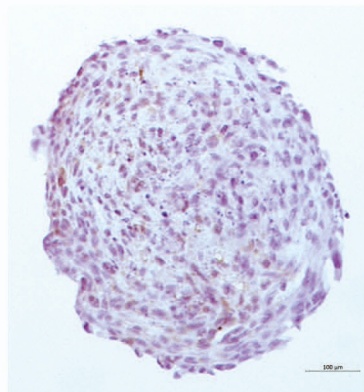

B

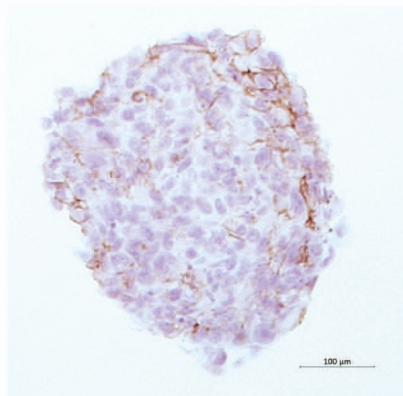

C

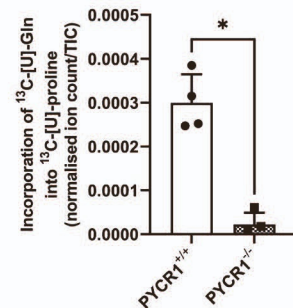

D

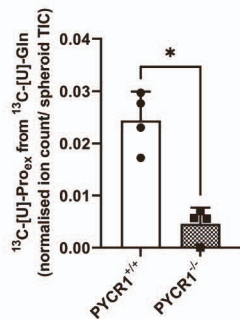

E

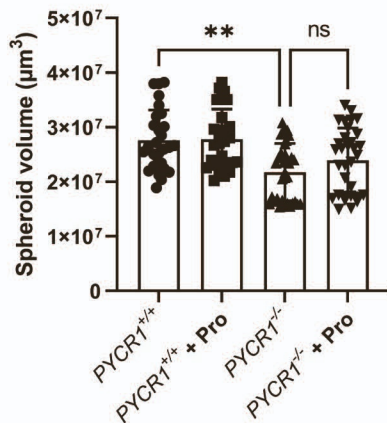

### Supplementary Figure 3: Loss of PYCR1 in a 3D cell culture model. Related to Figure 3.

**A:** Image of a representative SUM159PT spheroid stained with the hypoxia marker, pimonidazole, showing diffuse areas of hypoxia. **B:** Image showing staining of the hypoxia-induced glucose transporter, GLUT1 in SUM159PT spheroid. **C:** PYCR1<sup>-/-</sup> spheroids synthesise less  $^{13}\text{C}$ -[U]-proline from  $^{13}\text{C}$ -[U]-glutamine. \*,  $p < 0.05$ . This is reflected in reduced excretion of proline into the media (**D**), consistent with data from 2D culture. \*,  $p < 0.05$ . **E:** PYCR1<sup>-/-</sup> spheroid growth is not rescued by exogenous proline supplementation. All data presented as mean  $\pm$  SD

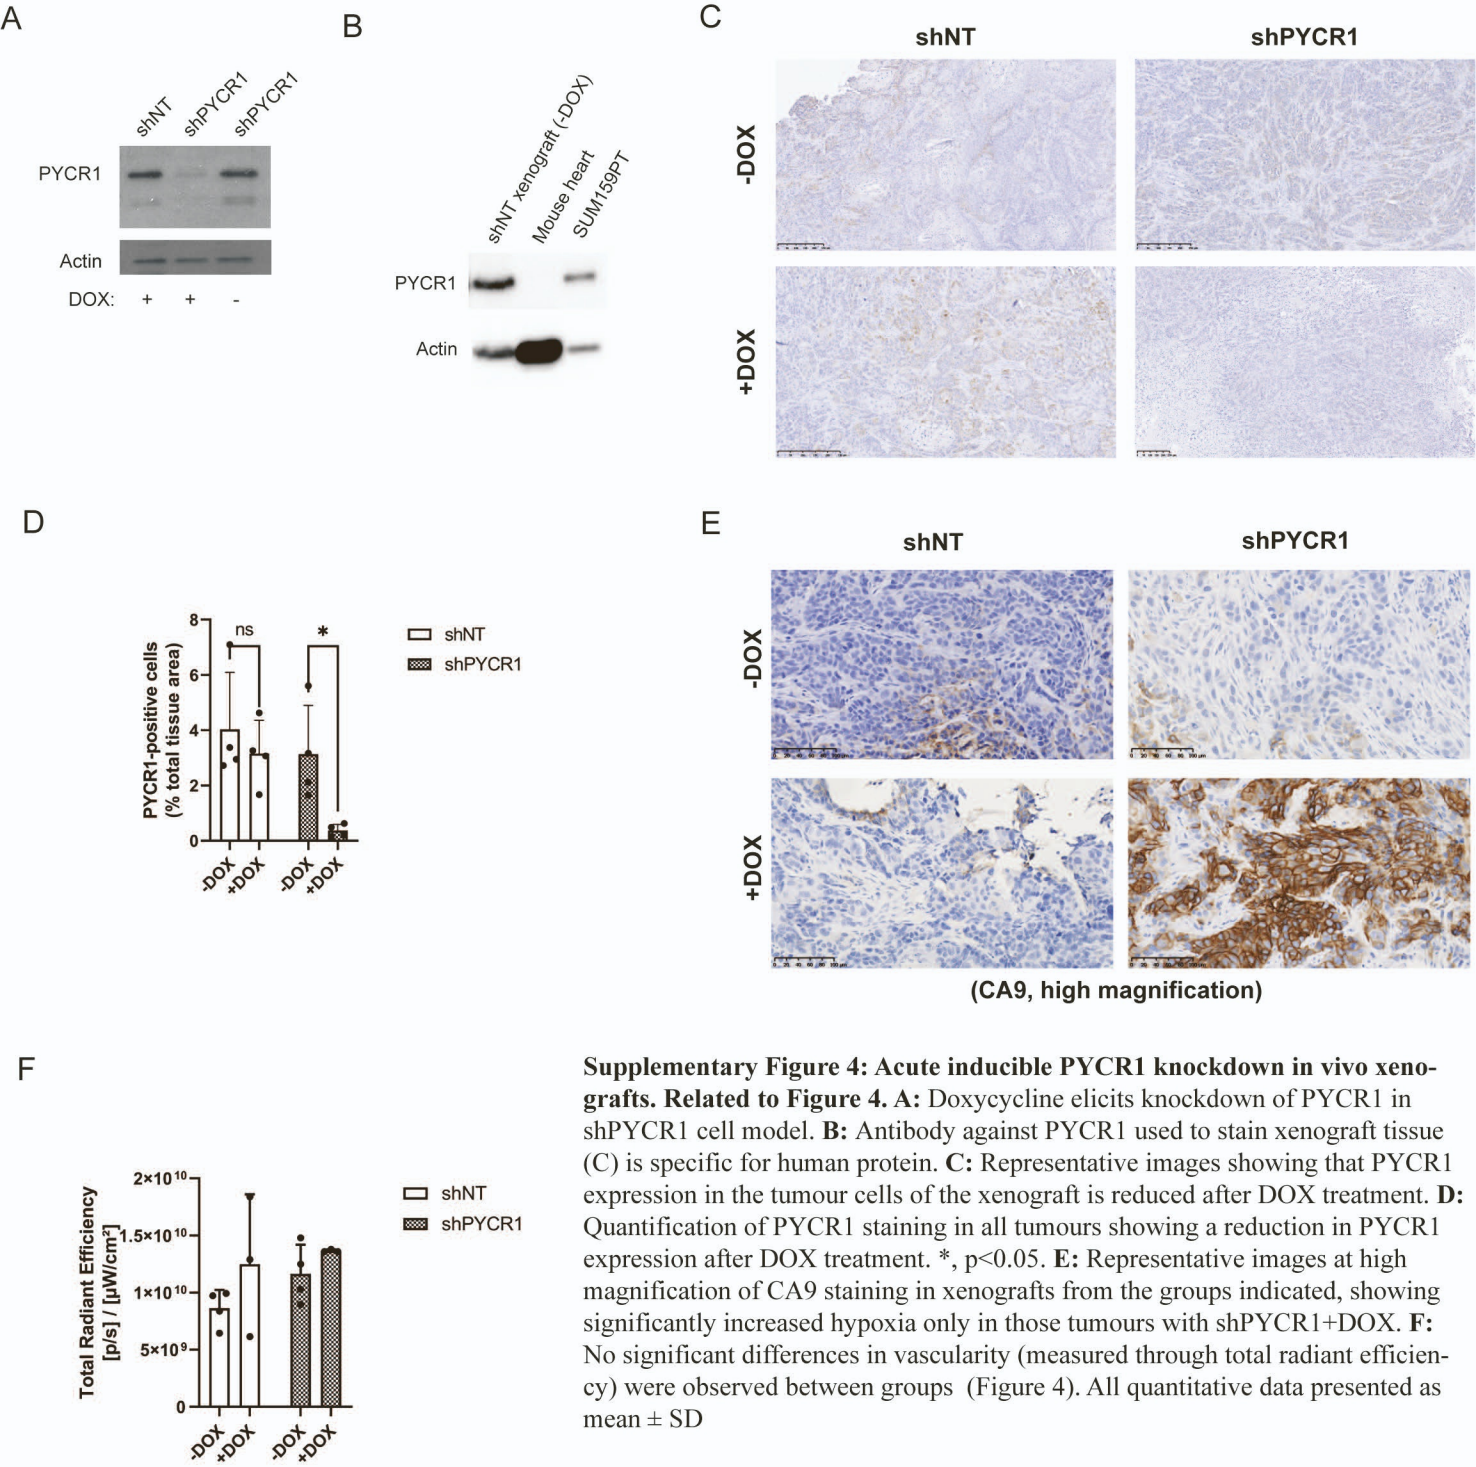



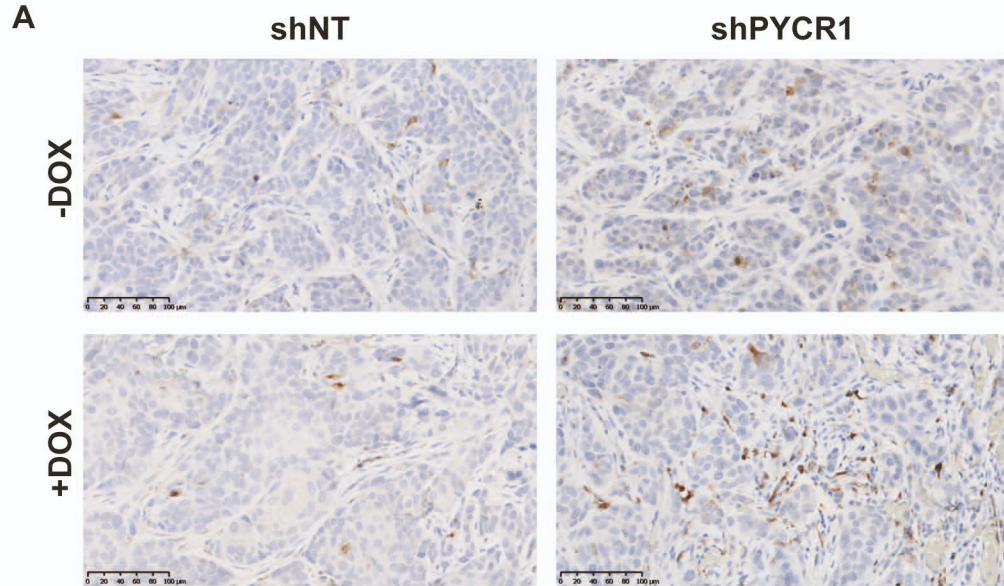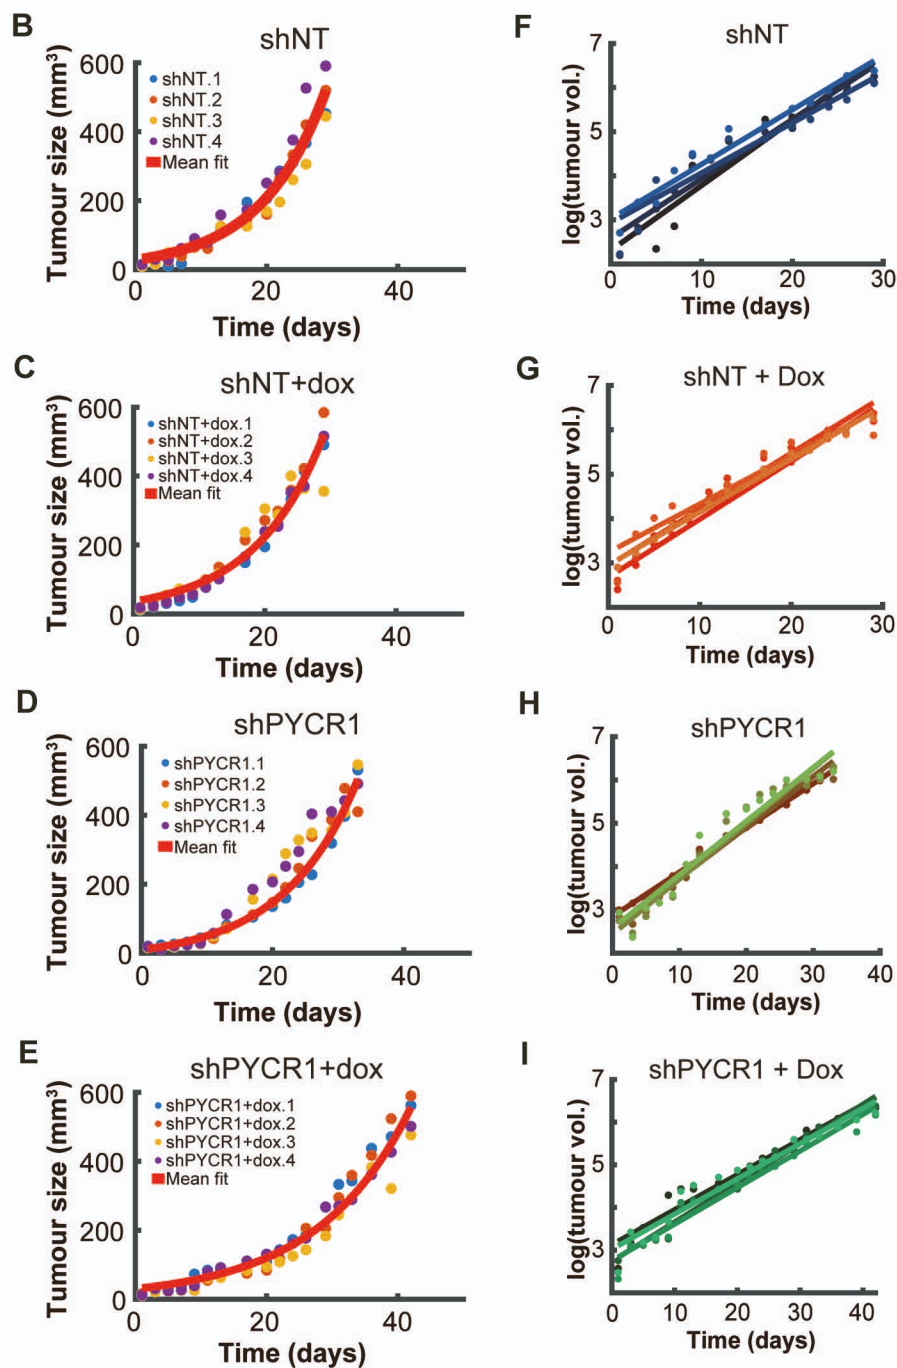

**Supplementary Figure 5: Xenograft phenotype and xenograft growth curve fitting. Related to Figure 5. A:** Representative higher magnification image of xenograft tumours stained for cleaved caspase-3. Scale bar = 100 mm. **B-E:** Exponential model fit of xenograft growth curves. **F-I:** Linear regression of log-transformed fitted curves B-E, allowing for appropriate statistical analysis (results shown in Figure 5F).
